# Supplementary material
Source: Research Square preprint supplement (doi:10.21203/rs.3.rs-8825232/v1)
Supplement: Supplementary file 1 [file 37049b1654e53334d0396750.docx]

ADDITIONAL FILES:


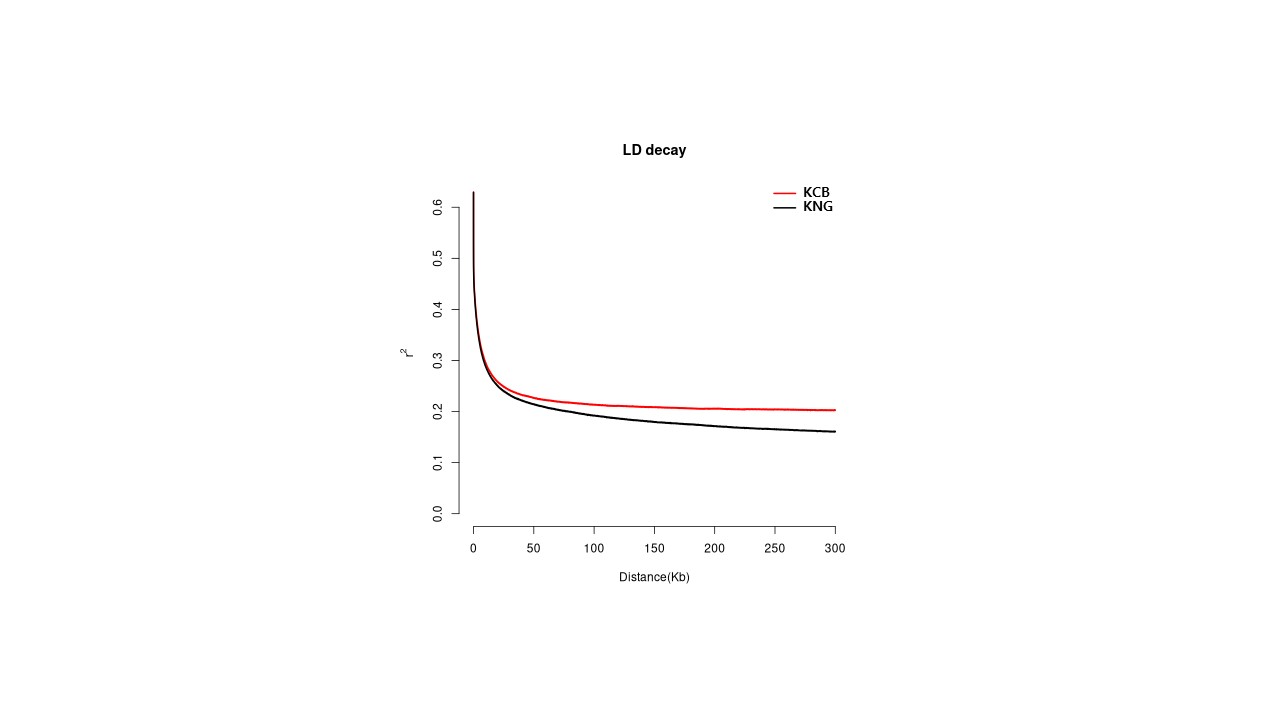


**Supplementary Fig. 1.** Results of LD decay analysis.

**
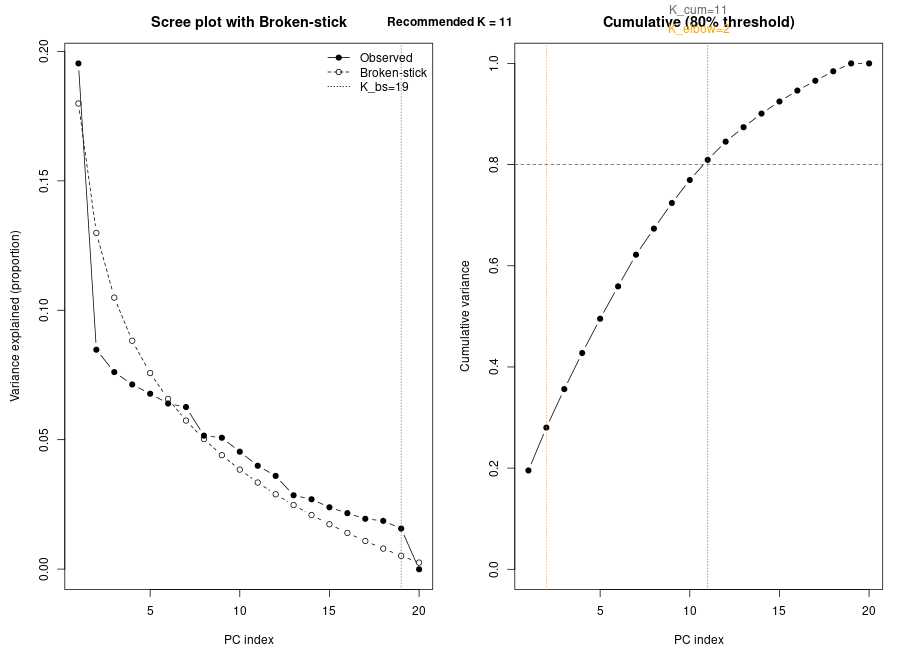
**

**Supplementary Fig. 2.** Optimization of principal component selection for PCA.

**Supplementary Table 1.** Summary of annotations number and region counts

| Type (alphabetical order) | Count | Percent (%) |
| --- | --- | --- |
| 3_prime_UTR_variant | 126,585 | 0.34 |
| 5_prime_UTR_premature_start_codon_gain_variant | 3,794 | 0.01 |
| 5_prime_UTR_variant | 28,974 | 0.08 |
| bidirectional_gene_fusion | 20 | 0.00 |
| conservative_inframe_deletion | 573 | 0.00 |
| conservative_inframe_insertion | 630 | 0.00 |
| disruptive_inframe_deletion | 1,218 | 0.00 |
| disruptive_inframe_insertion | 605 | 0.00 |
| downstream_gene_variant | 1,708,117 | 4.55 |
| exon_loss_variant | 8 | 0.00 |
| frameshift_variant | 4,113 | 0.01 |
| gene_fusion | 9 | 0.00 |
| initiator_codon_variant | 11 | 0.00 |
| intergenic_region | 16,929,108 | 45.12 |
| intragenic_variant | 1 | 0.00 |
| intron_variant | 16,650,086 | 44.38 |
| missense_variant | 103,173 | 0.28 |
| non_coding_transcript_exon_variant | 50,902 | 0.14 |
| non_coding_transcript_variant | 65 | 0.00 |
| splice_acceptor_variant | 683 | 0.00 |
| splice_donor_variant | 907 | 0.00 |
| splice_region_variant | 32,797 | 0.09 |
| start_lost | 193 | 0.00 |
| start_retained_variant | 4 | 0.00 |
| stop_gained | 1,353 | 0.00 |
| stop_lost | 166 | 0.00 |
| stop_retained_variant | 106 | 0.00 |
| synonymous_variant | 146,319 | 0.39 |
| upstream_gene_variant | 1,731,193 | 4.61 |
| DOWNSTREAM | 1,708,114 | 4.56 |
| EXON | 305,228 | 0.81 |
| GENE | 29 | 0.00 |
| INTERGENIC | 16,929,108 | 45.16 |
| INTRON | 16,622,870 | 44.34 |
| SPLICE_SITE_ACCEPTOR | 625 | 0.00 |
| SPLICE_SITE_DONOR | 814 | 0.00 |
| SPLICE_SITE_REGION | 29,983 | 0.08 |
| TRANSCRIPT | 66 | 0.00 |
| UPSTREAM | 1,731,193 | 4.62 |
| UTR_3_PRIME | 126,585 | 0.34 |
| UTR_5_PRIME | 32,767 | 0.09 |
